# Supplementary material for: Function Analysis of the PR55/B Gene Related to Self-Incompatibility in Chinese Cabbage Using CRISPR/Cas9
Source: MDPI journal article supplement (doi:10.3390/ijms23095062), 2022-05-03
Supplement: s1 [file s1]

## Supplementary materials

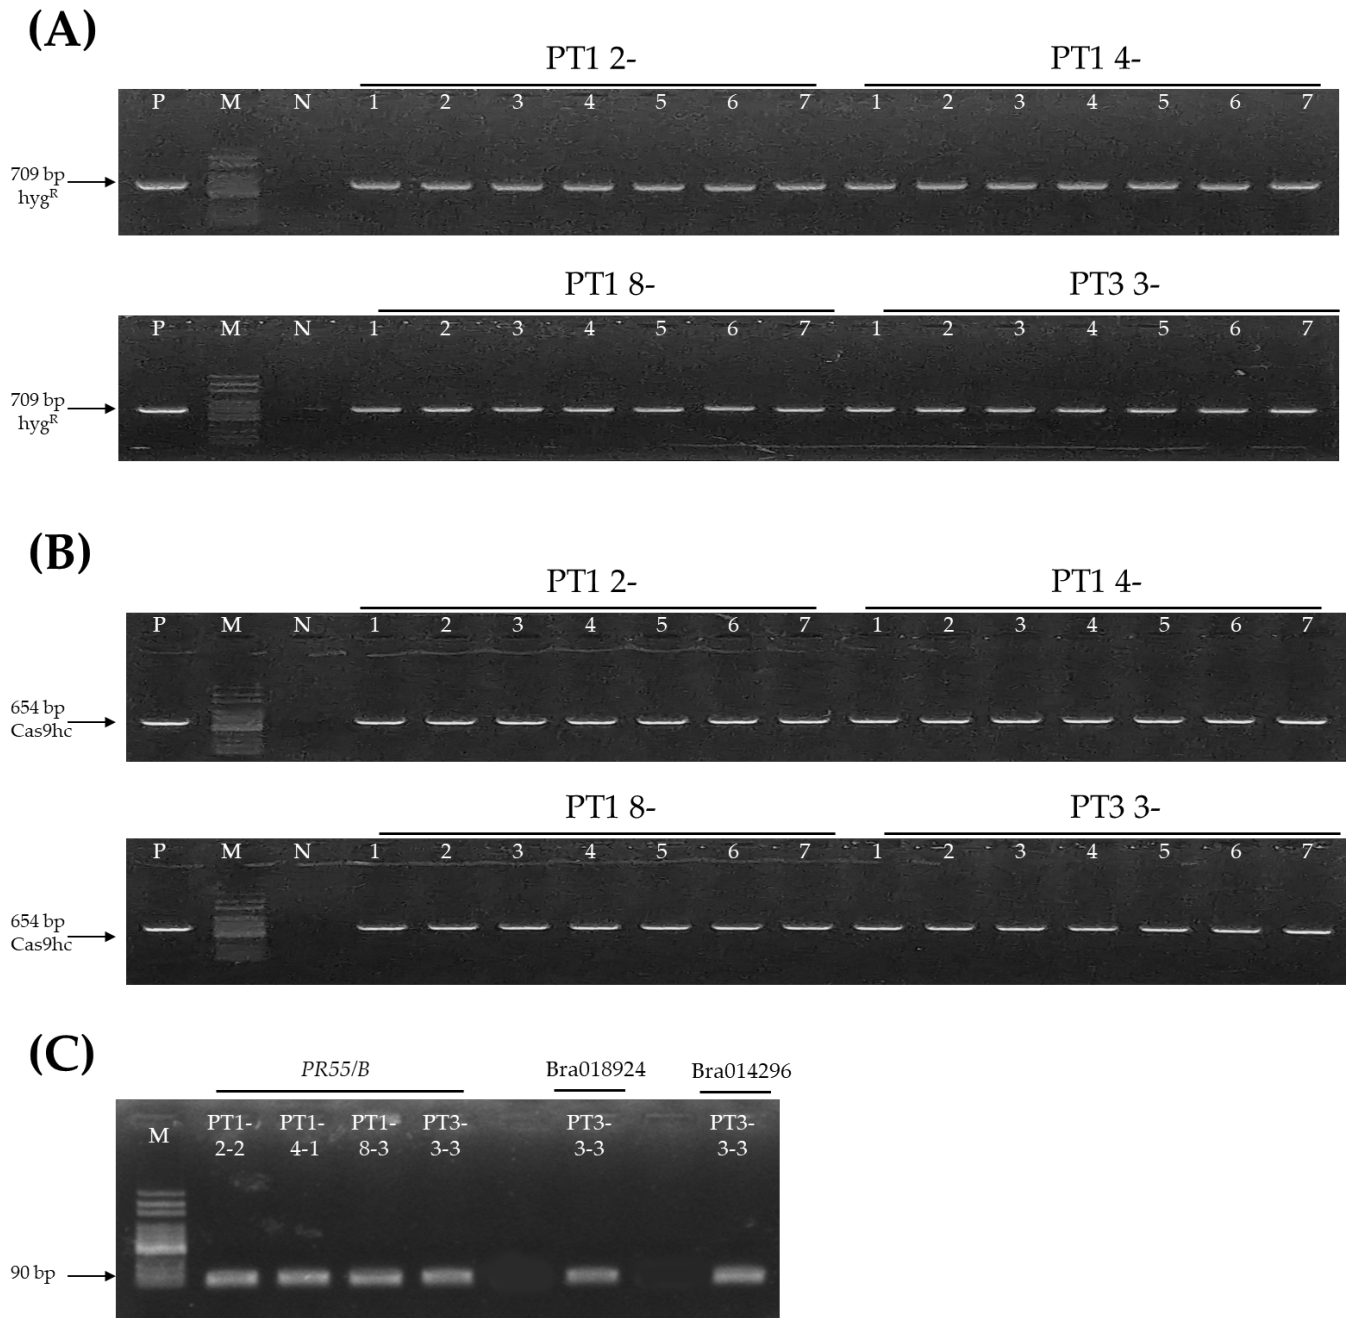

**Figure S1.** Selection of T<sub>1</sub> gene-edited lines by PCR and RT-PCR analysis. **(A)** PCR analysis with hyg<sup>R</sup> primer sets of T<sub>1</sub> gene-edited lines. **(B)** PCR analysis with Cas9hc primer sets of T<sub>1</sub> gene-edited lines. The 709 bp and 654 bp expected PCR products are indicated with an arrow, respectively. P, positive control; M, 100 bp DNA ladder; N, negative control; Numbering lane, gene-edited lines. **(C)** RT-PCR analysis with gene-specific primer sets of T<sub>1</sub> gene-edited lines. The 90bp expected RT-PCR products were amplified. P, positive control; M, 100 bp DNA ladder; N, negative control; Numbering lane, gene-edited lines.

**(A)**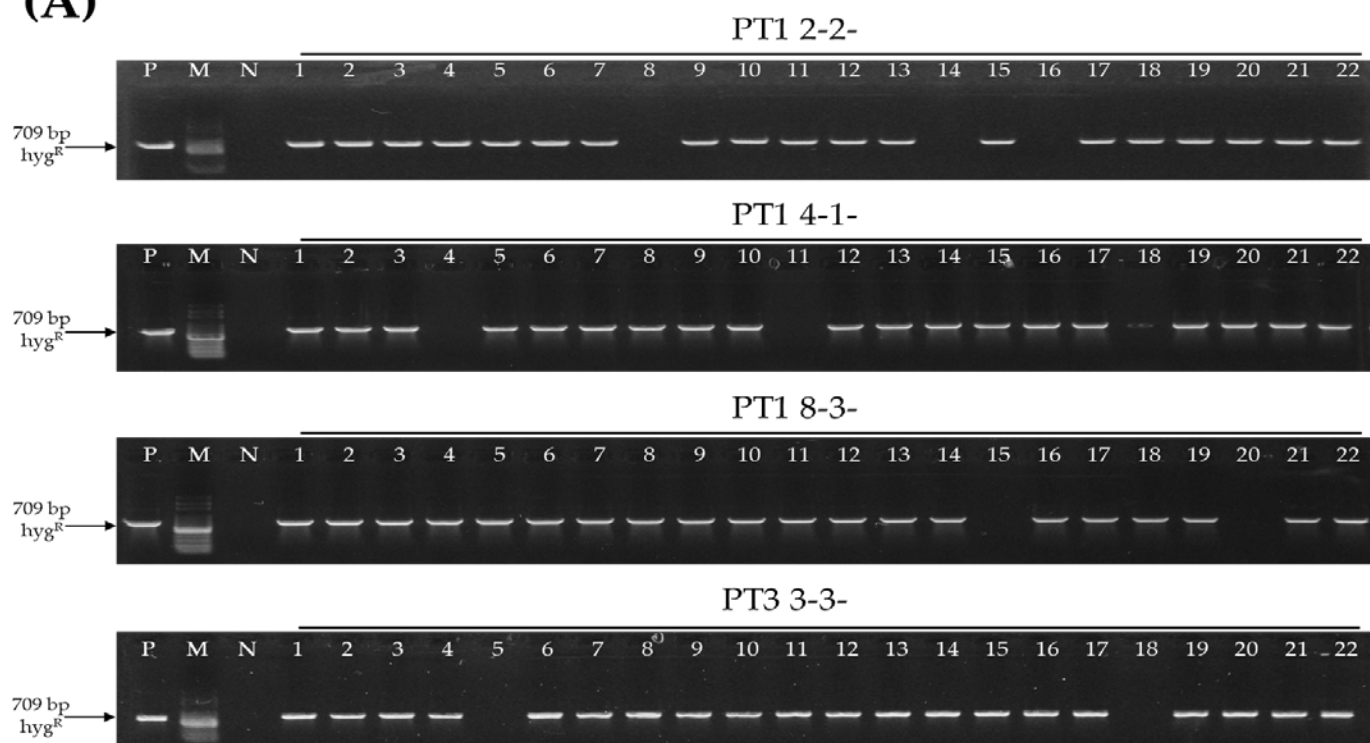**(B)**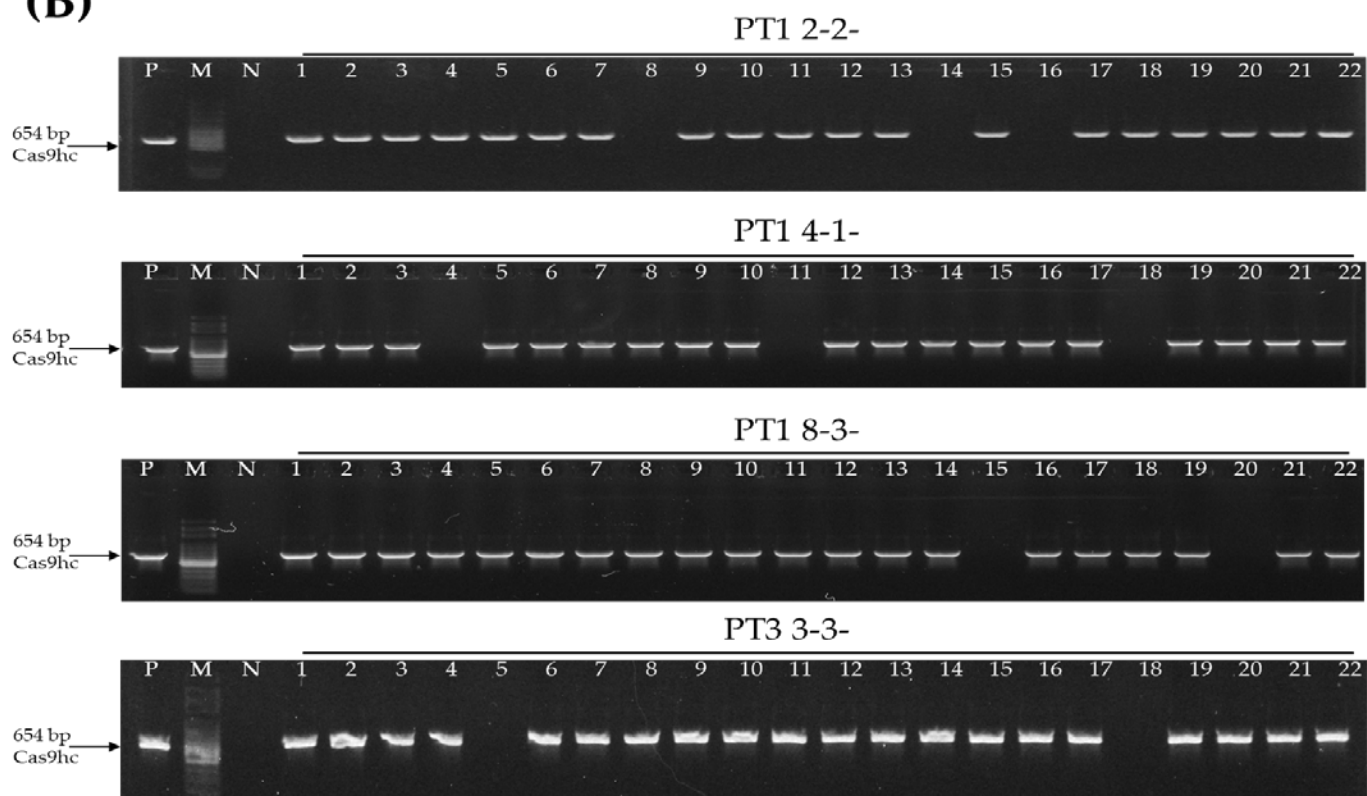

**Figure S2.** Selection of T<sub>2</sub> gene-edited lines by PCR analysis. **(A)** PCR analysis with hyg<sup>R</sup> primer sets of T<sub>2</sub> gene-edited lines. **(B)** PCR analysis with Cas9hc primer sets of T<sub>2</sub> gene-edited lines. The 709 bp and 654 bp expected PCR products are indicated with an arrow, respectively. P, positive control; M, 100 bp DNA ladder; N, negative control; Numbering lane, gene-edited lines.

**Table S1.** List of primer sets for PCR and RT-PCR analysis.

| Name                   | Primer         | Sequence (5'→3')              | Expected product size (bp) |
|------------------------|----------------|-------------------------------|----------------------------|
| <b>hyg<sup>R</sup></b> | F <sup>z</sup> | CGT CTG CTG CTC CAT ACA AG    | 709                        |
|                        | R              | TGT CGA GAA GTT TCT GAT CGA   |                            |
| <b>Cas9hc</b>          | F              | CCG CCA GGA GGA CTT CTA CC    | 654                        |
|                        | R              | ATG TTC TCG GGC TTG TGG CG    |                            |
| <b>PT1</b>             | F              | CTC AGG GTC ATG ACT CTG AAA   | 80                         |
| <b>cSEQ030425</b>      | R              | GCG ATC TTG AAG ACA CTG ATC A |                            |
| <b>PT3</b>             | F              | GCA GCA GGT CCT AAG TCG TT    | 91                         |
| <b>cSEQ030425</b>      | R              | ACG GCT AAG GAG ATA TCT TCC   |                            |
| <b>PT3</b>             | F              | TTG AGG AAC CAG ATG CA        | 103                        |
| <b>cSEQ018924</b>      | R              | CGG CTA AGT AAG TAT CTT CCT   |                            |
| <b>PT3</b>             | F              | CAC TGA GAT TAT TGC TTC AG    | 85                         |
| <b>cSEQ014296</b>      | R              | CTT AAG TGT CAT GTA GTC ACG   |                            |
|                        | R              | GCA GCA GGT CCT AAG TCG TT    |                            |

<sup>z</sup>F, forward primer; R, reverse primer.
